# Supplementary material
Source: HighWire-hosted journal article supplement (https://jnm.snmjournals.org/highwire/filestream/94782/field_highwire_adjunct_files/0/156927_Supplemental_Data.pdf)
Supplement: 156927_Supplemental_Data.pdf [file 156927_Supplemental_Data.pdf]

**Supplemental  
TABLE 1**

Summary of TF and FOS

| <b>Order</b>                  | <b>Matrix</b>                                               | <b>Features</b>                             |                                     |
|-------------------------------|-------------------------------------------------------------|---------------------------------------------|-------------------------------------|
| <b>First-order statistics</b> | Histogram                                                   | Variance                                    |                                     |
|                               |                                                             | Coefficient of variation (COV)              |                                     |
|                               |                                                             | Skewness                                    |                                     |
|                               |                                                             | Kurtosis                                    |                                     |
|                               |                                                             | Energy                                      |                                     |
| <b>Second-order features</b>  | GLCM                                                        | Entropy                                     |                                     |
|                               |                                                             | Autocorrelation                             |                                     |
|                               |                                                             | Contrast                                    |                                     |
|                               |                                                             | Correlation                                 |                                     |
|                               |                                                             | Cluster Shade (CS)                          |                                     |
|                               |                                                             | Dissimilarity                               |                                     |
|                               |                                                             | Energy                                      |                                     |
|                               |                                                             | Entropy                                     |                                     |
|                               |                                                             | Inverse Difference (ID)                     |                                     |
|                               |                                                             | Homogeneity                                 |                                     |
|                               |                                                             | Maximum Probability (MP)                    |                                     |
|                               |                                                             | Sum of Squares (SOS)                        |                                     |
|                               |                                                             | Sum Average (SA)                            |                                     |
|                               |                                                             | Sum Variance (SV)                           |                                     |
|                               |                                                             | Sum Entropy (SE)                            |                                     |
|                               |                                                             | Difference Variance (DV)                    |                                     |
|                               |                                                             | Difference Entropy (DE)                     |                                     |
|                               |                                                             | Information Measure of Correlation (IMC)    |                                     |
|                               |                                                             | Inverse Difference Normalized (IDN)         |                                     |
|                               |                                                             | Inverse Difference Moment Normalized (IDMN) |                                     |
| Diagonal Moment (DM)          |                                                             |                                             |                                     |
| <b>High-order features</b>    | GLRLM                                                       | Second Diagonal Moment (SDN)                |                                     |
|                               |                                                             | Short-run emphasis (SRE)                    |                                     |
|                               |                                                             | Long-run emphasis (LRE)                     |                                     |
|                               |                                                             | Low grey-level run emphasis (LGRE)          |                                     |
|                               |                                                             | High grey-level run emphasis (HGRE)         |                                     |
|                               |                                                             | Short-run low grey-level emphasis (SRLGE)   |                                     |
|                               |                                                             | Short-run high grey-level emphasis (SRHGE)  |                                     |
|                               |                                                             | Long-run low grey-level emphasis (LRLGE)    |                                     |
|                               |                                                             | Long-run high grey-level emphasis (LRHGE)   |                                     |
|                               |                                                             | Grey-level non-uniformity for run (GLNr)    |                                     |
|                               |                                                             | Run-length non-uniformity (RLN)             |                                     |
|                               |                                                             | Run percentage (RP)                         |                                     |
|                               |                                                             | GLSZM                                       | Short-zone emphasis (SZE)           |
|                               |                                                             |                                             | Long- zone emphasis (LZE)           |
|                               |                                                             |                                             | Low grey-level zone emphasis (LGZE) |
|                               | High grey-level zone emphasis (HGZE)                        |                                             |                                     |
|                               | Short-zone low grey-level emphasis (SZLGE)                  |                                             |                                     |
|                               | Short-zone high grey-level emphasis (SZHGE)                 |                                             |                                     |
|                               | Long-zone low grey-level emphasis (LZLGE)                   |                                             |                                     |
|                               | Long-zone high grey-level emphasis (LZHGE)                  |                                             |                                     |
|                               | Grey-level non-uniformity for zone (GLNz)                   |                                             |                                     |
|                               | Zone-length non-uniformity (ZLN)                            |                                             |                                     |
|                               | Zone percentage (ZP)                                        |                                             |                                     |
|                               | Weighted variance of gray-level size, N direction (WVGLZ_N) |                                             |                                     |
|                               | Weighted variance of gray-level size, S direction (WVGLZ_S) |                                             |                                     |
|                               | NGLDM                                                       |                                             | Small number emphasis (SNE)         |
|                               |                                                             |                                             | Large number emphasis (LNE)         |
|                               |                                                             | Number nonuniformity (NN)                   |                                     |
|                               |                                                             | Second moment (SM)                          |                                     |
|                               | NGTDM                                                       | Entropy                                     |                                     |
| Coarseness                    |                                                             |                                             |                                     |
| Contrast                      |                                                             |                                             |                                     |
| Busyness                      |                                                             |                                             |                                     |
| Complexity                    |                                                             |                                             |                                     |
|                               |                                                             | Texture strength (TS)                       |                                     |

**Supplemental TABLE 2**

Impact of iteration number on TF and FOS for each individual reconstruction algorithm. (A): OSEM; (B): OSEM+PSF; (C): OSEM+TOF, (D): OSEM+PSF+TOF

(A)

|       | COV≤5%                                                                               | 5%<COV≤10%                                             | 10%<COV≤20%          | COV>20%  |
|-------|--------------------------------------------------------------------------------------|--------------------------------------------------------|----------------------|----------|
| FOS   | COV, Kurtosis, Energy, Entropy, SUVmean, SUVpeak, SUVmax                             |                                                        | Variance             | Skewness |
| GLCM  | Dissimilarity, Energy, Entropy, ID, Homogeneity, SA, SE, DE, IMC, IDM, IDMN, DM, SDN | Autocorrelation, Contrast, MP, SOS, SV, DV             | Correlation          | CS       |
| GLRLM | GLNr, RLN, RP, LGRE, HGRE                                                            | SRE, LRE, SRLGE, SRHGE, LRLGE, LRHGE                   |                      |          |
| GLSZM | GLNz, ZLN, LGZE, HGZE                                                                | SZE, LZE, SZLGE, SZHGE, LZLGE, LZHGE, WVGLZ_N, WVGLZ_S | ZP                   |          |
| NGLDM | Entropy                                                                              | SNE, NN, SM                                            | LNE                  |          |
| NGTDM |                                                                                      | Coarseness, Contrast, TS                               | Busyness, Complexity |          |

(B)

|       | COV≤5%                                                                  | 5%<COV≤10%                                              | 10%<COV≤20%                          | COV>20% |
|-------|-------------------------------------------------------------------------|---------------------------------------------------------|--------------------------------------|---------|
| FOS   | COV, Energy, Entropy, SUVmean, SUVpeak                                  | Kurtosis, SUVmax                                        | Variance, Skewness                   |         |
| GLCM  | Dissimilarity, Energy, Entropy, ID, SA, SE, DE, IMC, IDM, IDMN, DM, SDN | Autocorrelation, Contrast, Homogeneity, MP, SOS, SV, DV | Correlation                          | CS      |
| GLRLM | GLNr, RLN, RP, LGRE, HGRE                                               | SRE, LRE, SRLGE, SRHGE, LRLGE, LRHGE                    |                                      |         |
| GLSZM | GLNz, ZLN, LGZE                                                         | SZE, LZE, HGZE, SZLGE, SZHGE, LZLGE, WVGLZ_N, WVGLZ_S   | ZP, LZHGE                            |         |
| NGLDM | Entropy                                                                 | SNE, NN, SM                                             | LNE                                  |         |
| NGTDM |                                                                         | Contrast                                                | Coarseness, Busyness, Complexity, TS |         |

(C)

|       | COV≤5%                                                                                    | 5%<COV≤10%                                         | 10%<COV≤20%    | COV>20% |
|-------|-------------------------------------------------------------------------------------------|----------------------------------------------------|----------------|---------|
| FOS   | COV, Kurtosis, Energy, Entropy, SUVmean, SUVpeak, SUVmax                                  | Variance                                           | Skewness       |         |
| GLCM  | Dissimilarity, Energy, Entropy, ID, Homogeneity, SOS, SA, SE, DE, IMC, IDM, IDMN, DM, SDN | Autocorrelation, Contrast, Correlation, MP, SV, DV |                | CS      |
| GLRLM | LRE, GLNr, RLN, RP, LGRE, HGRE, LRLGE, LRHGE                                              | SRE, SRLGE, SRHGE                                  |                |         |
| GLSZM | LZE, ZLN, LGZE                                                                            | SZE, GLNz, HGZE, SZLGE, SZHGE, LZLGE, WVGLZ_S      | LZHGE, WVGLZ_N | ZP      |
| NGLDM | SNE, SM, Entropy                                                                          | LNE, NN                                            |                |         |
| NGTDM |                                                                                           | Coarseness, Contrast, Busyness, TS                 | Complexity     |         |

(D)

|       | COV≤5%                                                                               | 5%<COV≤10%                                            | 10%<COV≤20% | COV>20% |
|-------|--------------------------------------------------------------------------------------|-------------------------------------------------------|-------------|---------|
| FOS   | COV, Kurtosis, Entropy, SUVmean, SUVpeak, SUVmax                                     | Variance, Energy                                      | Skewness    |         |
| GLCM  | Dissimilarity, Energy, Entropy, ID, Homogeneity, SA, SE, DE, IMC, IDM, IDMN, DM, SDN | Autocorrelation, Contrast, MP, SOS, SV, DV            | Correlation | CS      |
| GLRLM | GLNr, RLN, RP, LGRE, HGRE                                                            | SRE, LRE, SRLGE, SRHGE, LRLGE, LRHGE                  |             |         |
| GLSZM | GLNz, ZLN, LGZE                                                                      | SZE, LZE, HGZE, SZLGE, SZHGE, LZLGE, WVGLZ_N, WVGLZ_S | ZP, LZHGE   |         |
| NGLDM | SNE, Entropy                                                                         | LNE, NN, SM                                           |             |         |
| NGTDM |                                                                                      | Coarseness, Contrast, Busyness, TS                    | Complexity  |         |

**Supplemental  
TABLE 3**

Impact of FWHM on TF and FOS for each individual reconstruction algorithm. (A): OSEM; (B): OSEM+PSF; (C): OSEM+TOF, (D): OSEM+PSF+TOF

| (A)   |                                                                     |                                         |                                                        |                       |
|-------|---------------------------------------------------------------------|-----------------------------------------|--------------------------------------------------------|-----------------------|
|       | COV≤5%                                                              | 5%<COV≤10%                              | 10%<COV≤20%                                            | COV>20%               |
| FOS   | Entropy, SUVmean, SUVpeak                                           | COV, Kurtosis, Energy, SUVmax           |                                                        | Variance, Skewness    |
| GLCM  | Energy, Entropy, ID, SE, DE, IMC, IDM, IDMN, DM                     | Dissimilarity, Homogeneity, MP, SA, SDN | Autocorrelation, Contrast, Correlation, SOS, SV, DV    | CS                    |
| GLRLM | GLNr, RP, LGRE, HGRE                                                | RLN                                     | SRE, LRE, SRLGE, SRHGE, LRLGE, LRHGE                   |                       |
| GLSZM | ZLN, LGZE                                                           | GLNz, HGZE                              | LZE, SZHGE, LZLGE, WVGLZ_N, WVGLZ_S                    | SZE, ZP, SZLGE, LZHGE |
| NGLDM | Entropy                                                             | SNE, NN, SM                             | LNE                                                    |                       |
| NGTDM |                                                                     | TS                                      | Coarseness, Contrast, Busyness                         | Complexity            |
| (B)   |                                                                     |                                         |                                                        |                       |
|       | COV≤5%                                                              | 5%<COV≤10%                              | 10%<COV≤20%                                            | COV>20%               |
| FOS   | Entropy, SUVpeak                                                    | COV, Kurtosis, Energy, SUVmean          | SUVmax                                                 | Variance, Skewness    |
| GLCM  | Dissimilarity, Energy, Entropy, ID, SE, DE, IMC, IDM, IDMN, DM, SDN | Contrast, Homogeneity, MP, SA, DV       | Autocorrelation, Correlation, SOS, SV                  | CS                    |
| GLRLM | GLNr, RP, LGRE, HGRE                                                | RLN                                     | SRE, LRE, SRLGE, SRHGE, LRLGE, LRHGE                   |                       |
| GLSZM | GLNz, ZLN, LGZE                                                     | HGZE, WVGLZ_N, WVGLZ_S                  | SZE, LZE, ZP, SZLGE, SZHGE, LZLGE, LZHGE               |                       |
| NGLDM | SNE, Entropy                                                        | LNE, NN, SM                             |                                                        |                       |
| NGTDM |                                                                     | Coarseness, Contrast, TS                | Busyness, Complexity                                   |                       |
| (C)   |                                                                     |                                         |                                                        |                       |
|       | COV≤5%                                                              | 5%<COV≤10%                              | 10%<COV≤20%                                            | COV>20%               |
| FOS   | Entropy, SUVpeak                                                    | COV, Kurtosis, Energy, SUVmean          | SUVmax                                                 | Variance, Skewness    |
| GLCM  | Energy, Entropy, ID, SE, DE, IMC, IDM, IDMN, DM                     | Dissimilarity, Homogeneity, MP, SA, SDN | Autocorrelation, Contrast, Correlation, SOS, SV, DV    | CS                    |
| GLRLM | GLNr, RP, LGRE, HGRE                                                | RLN                                     | SRE, LRE, SRLGE, SRHGE, LRLGE, LRHGE                   |                       |
| GLSZM | LGZE                                                                | GLNz, ZLN, HGZE, WVGLZ_N                | SZE, LZE, SZLGE, SZHGE, LZLGE, LZHGE, WVGLZ_S          | ZP                    |
| NGLDM | Entropy                                                             | SNE, NN, SM                             | LNE                                                    |                       |
| NGTDM |                                                                     | TS                                      | Coarseness, Contrast, Busyness, Complexity             |                       |
| (D)   |                                                                     |                                         |                                                        |                       |
|       | COV≤5%                                                              | 5%<COV≤10%                              | 10%<COV≤20%                                            | COV>20%               |
| FOS   | Entropy                                                             | COV, Kurtosis, Energy, SUVmean, SUVpeak | SUVmax                                                 | Variance, Skewness    |
| GLCM  | Energy, Entropy, ID, SE, DE, IMC, IDM, IDMN, DM                     | Dissimilarity, Homogeneity, MP, SA, SDN | Autocorrelation, Contrast, Correlation, SOS, SV, DV    | CS                    |
| GLRLM | GLNr, RP, LGRE, HGRE                                                | RLN                                     | SRE, LRE, SRLGE, SRHGE, LRLGE, LRHGE                   |                       |
| GLSZM | GLNz, ZLN, LGZE                                                     | HGZE                                    | SZE, LZE, SZLGE, SZHGE, LZLGE, LZHGE, WVGLZ_N, WVGLZ_S | ZP                    |
| NGLDM | SNE, Entropy                                                        | NN, SM                                  | LNE                                                    |                       |
| NGTDM |                                                                     | Coarseness, TS                          | Contrast, Busyness, Complexity                         |                       |

**Supplemental  
TABLE 4**

Impact of grid size on TF and FOS for each individual reconstruction algorithm. (A): OSEM; (B): OSEM+PSF; (C): OSEM+TOF, (D): OSEM+PSF+TOF

(A)

|       | COV≤5%        | 5%<COV≤10%            | 10%<COV≤20%                           | COV>20%                                                                             |
|-------|---------------|-----------------------|---------------------------------------|-------------------------------------------------------------------------------------|
| FOS   | Entropy       | COV, SUVmean, SUVpeak | Variance, Kurtosis, Energy, SUVmax    | Skewness                                                                            |
| GLCM  | DE, IDM, IDMN | SA, SE                | Autocorrelation, Entropy, ID, SOS, SV | Contrast, Correlation, CS, Dissimilarity, Energy, Homogeneity, MP, DV, IMC, DM, SDN |
| GLRLM | LGRE, HGRE    |                       |                                       | SRE, LRE, GLNr, RLN, RP, SRLGE, SRHGE, LRLGE, LRHGE                                 |
| GLSZM | LGZE          | HGZE                  | SZE, LZE, SZLGE, LZLGE, LZHGE         | GLNz, ZLN, ZP, SZHGE, WVGLZ_N, WVGLZ_S                                              |
| NGLDM |               |                       | SNE                                   | LNE, NN, SM, Entropy                                                                |
| NGTDM |               |                       |                                       | Coarseness, Contrast, Busyness, Complexity, TS                                      |

(B)

|       | COV≤5%            | 5%<COV≤10%                     | 10%<COV≤20%                    | COV>20%                                                                             |
|-------|-------------------|--------------------------------|--------------------------------|-------------------------------------------------------------------------------------|
| FOS   | Entropy, SUVpeak  | Variance, COV, SUVmean, SUVmax | Kurtosis, Energy               | Skewness                                                                            |
| GLCM  | SA, DE, IDM, IDMN | Autocorrelation, SOS, SV, SE   | Entropy, ID                    | Contrast, Correlation, CS, Dissimilarity, Energy, Homogeneity, MP, DV, IMC, DM, SDN |
| GLRLM | LGRE, HGRE        |                                | LRE, LRLGE, LRHGE              | SRE, GLNr, RLN, RP, SRLGE, SRHGE                                                    |
| GLSZM | LGZE              | LZE, LZHGE                     | SZE, HGZE, SZLGE, SZHGE, LZLGE | GLNz, ZLN, ZP, WVGLZ_N, WVGLZ_S                                                     |
| NGLDM |                   |                                | SNE                            | LNE, NN, SM, Entropy                                                                |
| NGTDM |                   |                                |                                | Coarseness, Contrast, Busyness, Complexity, TS                                      |

(C)

|       | COV≤5%           | 5%<COV≤10%             | 10%<COV≤20%                           | COV>20%                                                                             |
|-------|------------------|------------------------|---------------------------------------|-------------------------------------------------------------------------------------|
| FOS   | Entropy, SUVpeak | COV, Kurtosis, SUVmean | Variance, Energy, SUVmax              | Skewness                                                                            |
| GLCM  | DE, IDM, IDMN    | SA, SE                 | Autocorrelation, Entropy, ID, SOS, SV | Contrast, Correlation, CS, Dissimilarity, Energy, Homogeneity, MP, DV, IMC, DM, SDN |
| GLRLM | LGRE, HGRE       |                        | LRE, LRLGE, LRHGE                     | SRE, GLNr, RLN, RP, SRLGE, SRHGE                                                    |
| GLSZM | LGZE             | HGZE                   | SZE, LZE, SZLGE, SZHGE, LZLGE, LZHGE  | GLNz, ZLN, ZP, WVGLZ_N, WVGLZ_S                                                     |
| NGLDM |                  |                        | SNE                                   | LNE, NN, SM, Entropy                                                                |
| NGTDM |                  |                        |                                       | Coarseness, Contrast, Busyness, Complexity, TS                                      |

(D)

|       | COV≤5%        | 5%<COV≤10%                 | 10%<COV≤20%                       | COV>20%                                                                             |
|-------|---------------|----------------------------|-----------------------------------|-------------------------------------------------------------------------------------|
| FOS   | Entropy       | Kurtosis, SUVmean, SUVpeak | Variance, COV, Energy, SUVmax     | Skewness                                                                            |
| GLCM  | DE, IDM, IDMN | SA, SV, SE                 | Autocorrelation, Entropy, ID, SOS | Contrast, Correlation, CS, Dissimilarity, Energy, Homogeneity, MP, DV, IMC, DM, SDN |
| GLRLM | LGRE, HGRE    |                            | LRE, LRLGE, LRHGE                 | SRE, GLNr, RLN, RP, SRLGE, SRHGE                                                    |
| GLSZM | LGZE          | LZE, LZLGE                 | SZE, HGZE, SZLGE, LZHGE           | GLNz, ZLN, ZP, SZHGE, WVGLZ_N, WVGLZ_S                                              |
| NGLDM |               |                            | SNE                               | LNE, NN, SM, Entropy                                                                |
| NGTDM |               |                            |                                   | Coarseness, Contrast, Busyness, Complexity, TS                                      |

**Supplemental  
TABLE 5**

Change of image features over the default reconstruction settings (**bin size = 128**)

|       | COV≤5%                                                              | 5%<COV≤10%                                      | 10%<COV≤20%                               | COV>20%           |
|-------|---------------------------------------------------------------------|-------------------------------------------------|-------------------------------------------|-------------------|
| FOS   | COV, Entropy                                                        | Kurtosis, Energy                                | Variance                                  | Skewness          |
| GLCM  | Dissimilarity, Energy, Entropy, ID, SE, DE, IMC, IDM, IDMN, DM, SDN | Contrast, Correlation, Homogeneity, MP, SA, DV, | Autocorrelation, SOS, SV                  | CS                |
| GLRLM | GLNr, RP, LGRE, HGRE                                                | RLN                                             | LRE, LRLGE, LRHGE                         | SRE, SRLGE, SRHGE |
| GLSZM | GLNz, LGZE, HGZE                                                    | ZLN, WVGLZ_N, WVGLZ_S                           | SZE, LZE, ZP, SZLGE, SZHGE, LZLGE, LZHGE, |                   |
| NGLDM | SNE, Entropy                                                        | LNE, NN, SM                                     |                                           |                   |
| NGTDM |                                                                     | Coarseness, Contrast, Busyness                  | Complexity, TS                            |                   |

**Supplemental  
TABLE 6**

Impact of iteration number on image features (**bin size = 128**)

|       | COV≤5%                                                                  | 5%<COV≤10%                                              | 10%<COV≤20%                          | COV>20%  |
|-------|-------------------------------------------------------------------------|---------------------------------------------------------|--------------------------------------|----------|
| FOS   | COV, Kurtosis, Entropy                                                  | Energy                                                  | Variance                             | Skewness |
| GLCM  | Dissimilarity, Energy, Entropy, ID, SA, SE, DE, IMC, IDM, IDMN, DM, SDN | Autocorrelation, Contrast, Homogeneity, MP, SOS, SV, DV | Correlation                          | CS       |
| GLRLM | GLNr, RLN, RP, LGRE, HGRE                                               | LRE, LRLGE, LRHGE                                       | SRE, SRLGE, SRHGE                    |          |
| GLSZM | GLNz, ZLN, LGZE, HGZE                                                   | SZE, LZE, SZLGE, SZHGE, LZLGE, LZHGE, WVGLZ_N, WVGLZ_S  | SZHGE                                | ZP       |
| NGLDM | SNE, SM, Entropy                                                        | LNE, NN                                                 |                                      |          |
| NGTDM |                                                                         | Contrast                                                | Coarseness, Busyness, Complexity, TS |          |

**Supplemental  
TABLE 7**

Impact of FWHM on image features (**bin size = 128**)

|       | COV≤5%                                          | 5%<COV≤10%                              | 10%<COV≤20%                                         | COV>20%            |
|-------|-------------------------------------------------|-----------------------------------------|-----------------------------------------------------|--------------------|
| FOS   | Entropy                                         | COV, Kurtosis, Energy                   |                                                     | Variance, Skewness |
| GLCM  | Energy, Entropy, ID, SE, DE, IMC, IDM, IDMN, DM | Dissimilarity, Homogeneity, MP, SA, SDN | Autocorrelation, Contrast, Correlation, SOS, SV, DV | CS                 |
| GLRLM | GLNr, RP, LGRE, HGRE                            | RLN                                     | SRE, LRE, SRLGE, SRHGE, LRLGE, LRHGE                |                    |
| GLSZM | GLNz, LGZE, HGZE                                | ZLN, WVGLZ_S                            | LZE, SZHGE, LZLGE, LZHGE, WVGLZ_N                   | SZE, ZP, SZLGE     |
| NGLDM | SNE, Entropy                                    | NN, SM                                  | LNE                                                 |                    |
| NGTDM |                                                 |                                         | Coarseness, Busyness, Contrast, Complexity, TS      |                    |

**Supplemental  
TABLE 8**

Impact of grid size on image features (bin size = 128)

|       | COV≤5%     | 5%<COV≤10%   | 10%<COV≤20%                       | COV>20%                                                                                 |
|-------|------------|--------------|-----------------------------------|-----------------------------------------------------------------------------------------|
| FOS   |            | COV, Entropy | Variance, Kurtosis                | Skewness, Energy                                                                        |
| GLCM  | IDM, IDMN  | SA, SE, DE   | Autocorrelation, Entropy, SOS, SV | Contrast, Correlation, CS, Dissimilarity, Energy, ID, Homogeneity, MP, DV, IMC, DM, SDN |
| GLRLM | LGRE, HGRE |              |                                   | SRE, LRE, GLNr, RLN, RP, SRLGE, SRHGE, LRLGE, LRHGE                                     |
| GLSZM | LGZE       | HGZE         | SZE, LZE, SZLGE, LZLGE, LZHG      | GLNz, ZLN, ZP, SZHG, WVGLZ_N, WVGLZ_S                                                   |
| NGLDM |            | SNE          |                                   | LNE, NN, SM, Entropy                                                                    |
| NGTDM |            |              |                                   | Coarseness, Contrast, Busyness, Complexity, TS                                          |



**Supplemental  
TABLE 9**

Change of image features over the default reconstruction settings (**bin size = 32**)

|       | COV≤5%                                                              | 5%<COV≤10%                                     | 10%<COV≤20%                                            | COV>20%  |
|-------|---------------------------------------------------------------------|------------------------------------------------|--------------------------------------------------------|----------|
| FOS   | COV, Entropy                                                        | Kurtosis, Energy                               | Variance                                               | Skewness |
| GLCM  | Dissimilarity, Entropy, ID, Homogeneity, SE, DE, IDM, IDMN, DM, SDN | Contrast, Correlation, Energy, MP, SA, DV, IMC | Autocorrelation, SOS, SV                               | CS       |
| GLRLM | GLNr, RP, LGRE, HGRE                                                | RLN                                            | SRE, LRE, SRLGE, SRHGE, LRLGE, LRHGE                   |          |
| GLSZM | LGZE                                                                | GLNz, ZLN, HGZE                                | SZE, LZE, SZLGE, SZHGE, LZLGE, LZHGE, WVGLZ_S, WVGLZ_N | ZP       |
| NGLDM | Entropy                                                             | SNE, NN, SM                                    | LNE                                                    |          |
| NGTDM |                                                                     | Coarseness, Busyness                           | Contrast, Complexity, TS                               |          |

**Supplemental  
TABLE 10**

Impact of iteration number on image features (**bin size = 32**)

|       | COV≤5%                                                                  | 5%<COV≤10%                                              | 10%<COV≤20%                          | COV>20%  |
|-------|-------------------------------------------------------------------------|---------------------------------------------------------|--------------------------------------|----------|
| FOS   | COV, Entropy                                                            | Kurtosis, Energy                                        | Variance                             | Skewness |
| GLCM  | Dissimilarity, Entropy, ID, Homogeneity, SA, SE, DE, IDM, IDMN, DM, SDN | Autocorrelation, Contrast, Energy, MP, SOS, SV, DV, IMC | Correlation                          | CS       |
| GLRLM | SRE, GLNr, RLN, RP, LGRE, HGRE, SRLGE, SRHGE                            | LRE, LRLGE, LRHGE                                       |                                      |          |
| GLSZM | ZLN, LGZE                                                               | SZE, LZE, GLNz, HGZE, SZLGE, LZLGE                      | SZHGE, LZHGE, WVGLZ_N, WVGLZ_S       | ZP       |
| NGLDM | Entropy                                                                 | SNE, NN, SM                                             | LNE                                  |          |
| NGTDM |                                                                         | Contrast                                                | Coarseness, Busyness, Complexity, TS |          |

**Supplemental  
TABLE 11**

Impact of FWHM on image features (**bin size = 32**)

|       | COV≤5%                             | 5%<COV≤10%                                          | 10%<COV≤20%                                         | COV>20%               |
|-------|------------------------------------|-----------------------------------------------------|-----------------------------------------------------|-----------------------|
| FOS   | Entropy                            | COV, Kurtosis, Energy                               |                                                     | Variance, Skewness    |
| GLCM  | Entropy, ID, SE, DE, IDM, IDMN, DM | Dissimilarity, Energy, Homogeneity, MP, SA,IMC, SDN | Autocorrelation, Contrast, Correlation, SOS, SV, DV | CS                    |
| GLRLM | GLNr, RP, LGRE, HGRE               | RLN                                                 | SRE, LRE, SRLGE, SRHGE, LRLGE, LRHGE                |                       |
| GLSZM | LGZE                               | GLNz, ZLN                                           | LZE, HGZE, SZHGE, LZLGE, WVGLZ_N, WVGLZ_S           | SZE, ZP, SZLGE, LZHGE |
| NGLDM | Entropy                            | NN, SM                                              | SNE, LNE                                            |                       |
| NGTDM |                                    | Contrast, TS                                        | Coarseness, Busyness                                | Complexity            |

**Supplemental  
TABLE 12**

Impact of grid size on image features (**bin size = 32**)

|       | COV≤5%        | 5%<COV≤10% | 10%<COV≤20%                               | COV>20%                                                                         |
|-------|---------------|------------|-------------------------------------------|---------------------------------------------------------------------------------|
| FOS   | Entropy       | Kurtosis   | Variance, COV, Energy                     | Skewness                                                                        |
| GLCM  | SE, IDM, IDMN | SA, DE     | Autocorrelation, Entropy, ID, SOS, SV, DM | Contrast, Correlation, CS, Dissimilarity, Energy, Homogeneity, MP, DV, IMC, SDN |
| GLRLM | LGRE, HGRE    |            |                                           | SRE, LRE, GLNr, RLN, RP, SRLGE, SRHGE, LRLGE, LRHGE                             |
| GLSZM |               | LGZE       | SZE, LZE, LZLGE                           | GLNz, ZLN, ZP, HGZE, SZLGE, SZHGE, LZHGE, WVGLZ_N, WVGLZ_S                      |
| NGLDM |               |            |                                           | SNE, LNE, NN, SM, Entropy                                                       |
| NGTDM |               |            |                                           | Coarseness, Contrast, Busyness, Complexity, TS                                  |
